# Supplementary material for: Associations between specialty care and improved outcomes among patients with diabetic foot ulcers
Source: PubMed Central journal article supplement (PMC10729988; doi:10.1371/journal.pone.0294813), 2023-12-19
Supplement: pone.0294813.s003.pdf [file pone.0294813.s003.pdf]

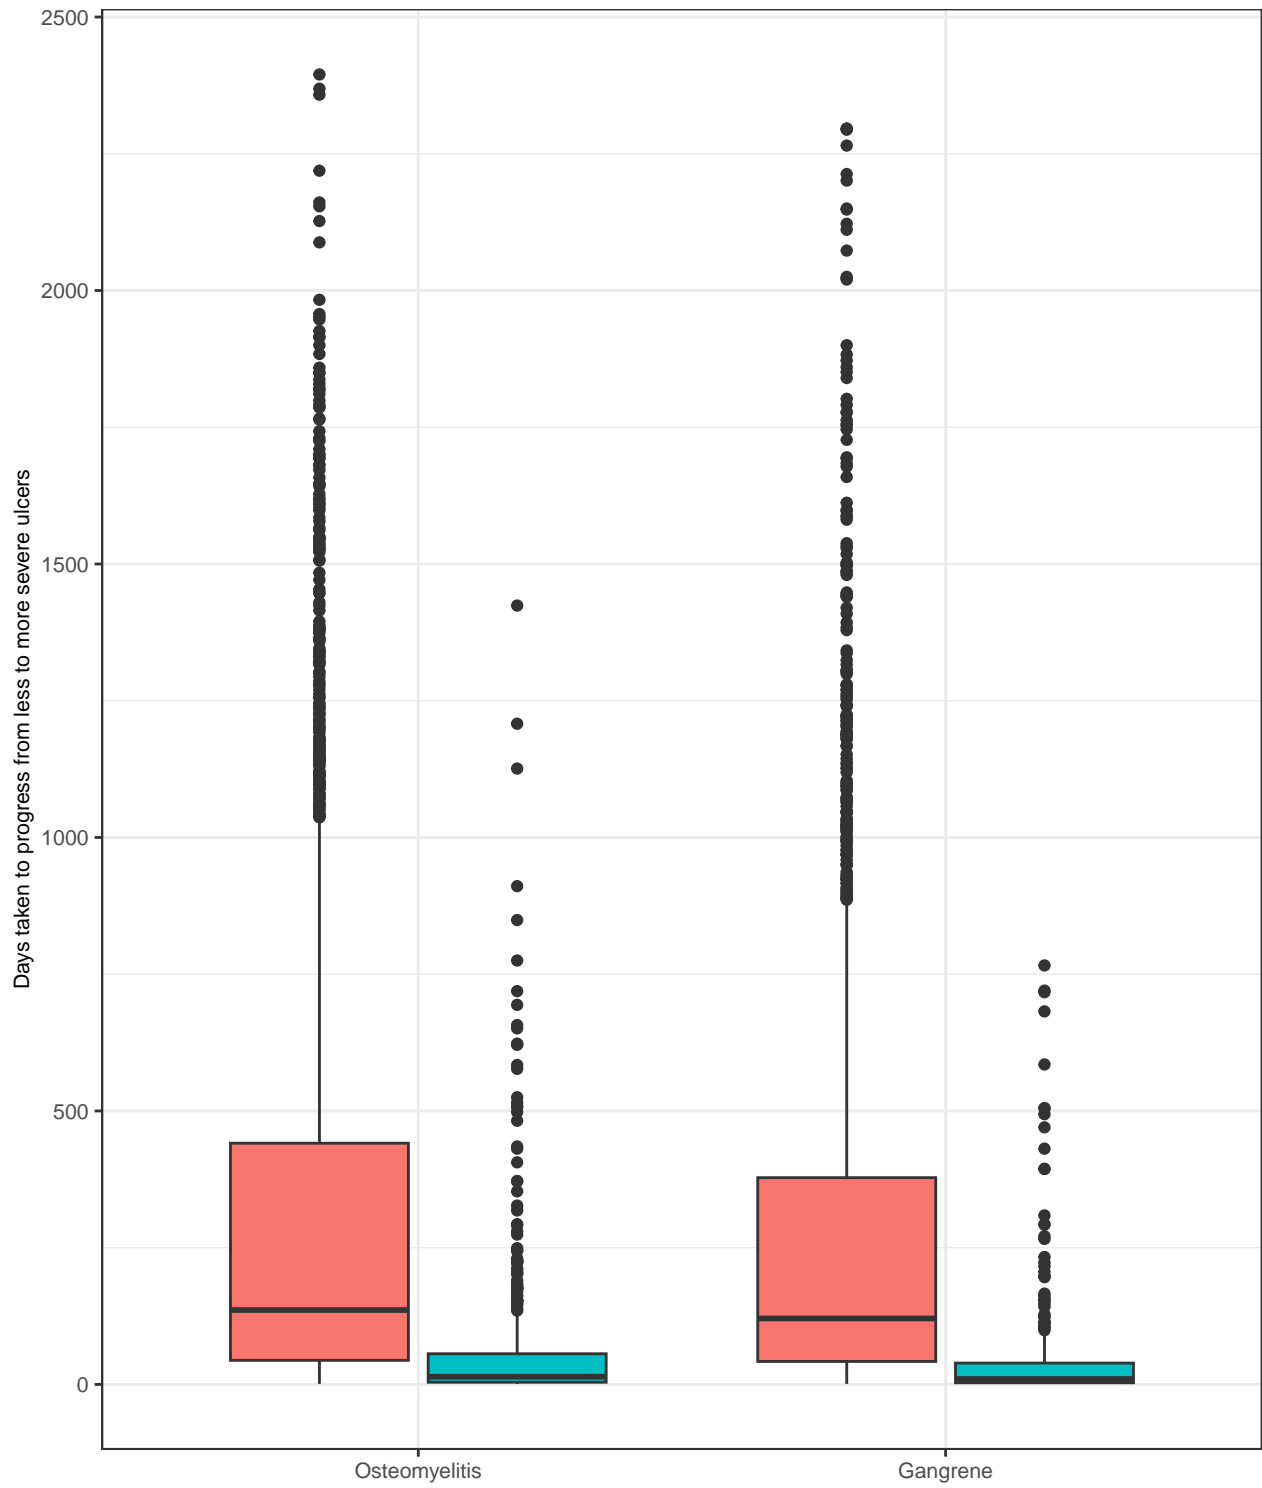

With specialty care in less severe strata    Without specialty care in less severe strata
